# Supplementary material for: Antibiotic Treatment in Anopheles coluzzii Affects Carbon and Nitrogen Metabolism
Source: MDPI journal article supplement (doi:10.3390/pathogens9090679), 2020-08-21
Supplement: s1 [file s1]

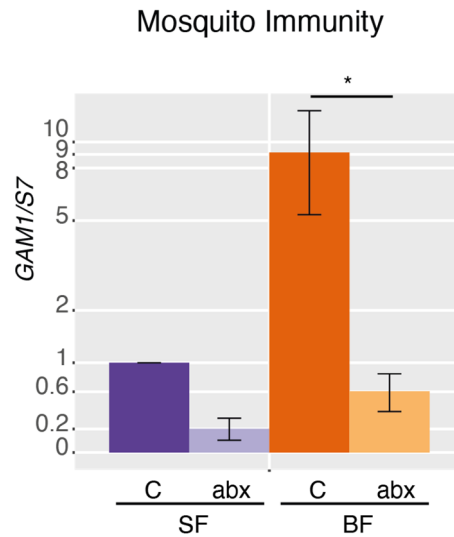

**Figure S1.** RT-qPCR analysis of GAM1 immune gene expression. Quantification of GAM1 in the gut of sugar-fed (SF) and blood-fed (BF) mosquito carrying a conventional (C) microbiota or treated with antibiotics (abx). Data show the average ratios of two independent replicates, and error bars represent the standard error. Tukey test were used to determine the confidence interval, ns non significative, \*  $p < 0.05$ , \*\*  $p < 0.01$ .

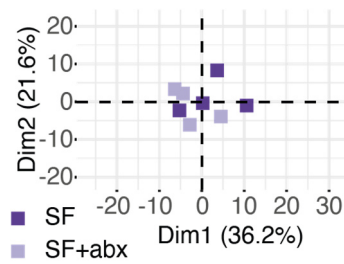

**Figure S2.** Principal Component Analysis (PCA) plot of the midgut metabolome. Only sugar-fed samples are included in the analysis.

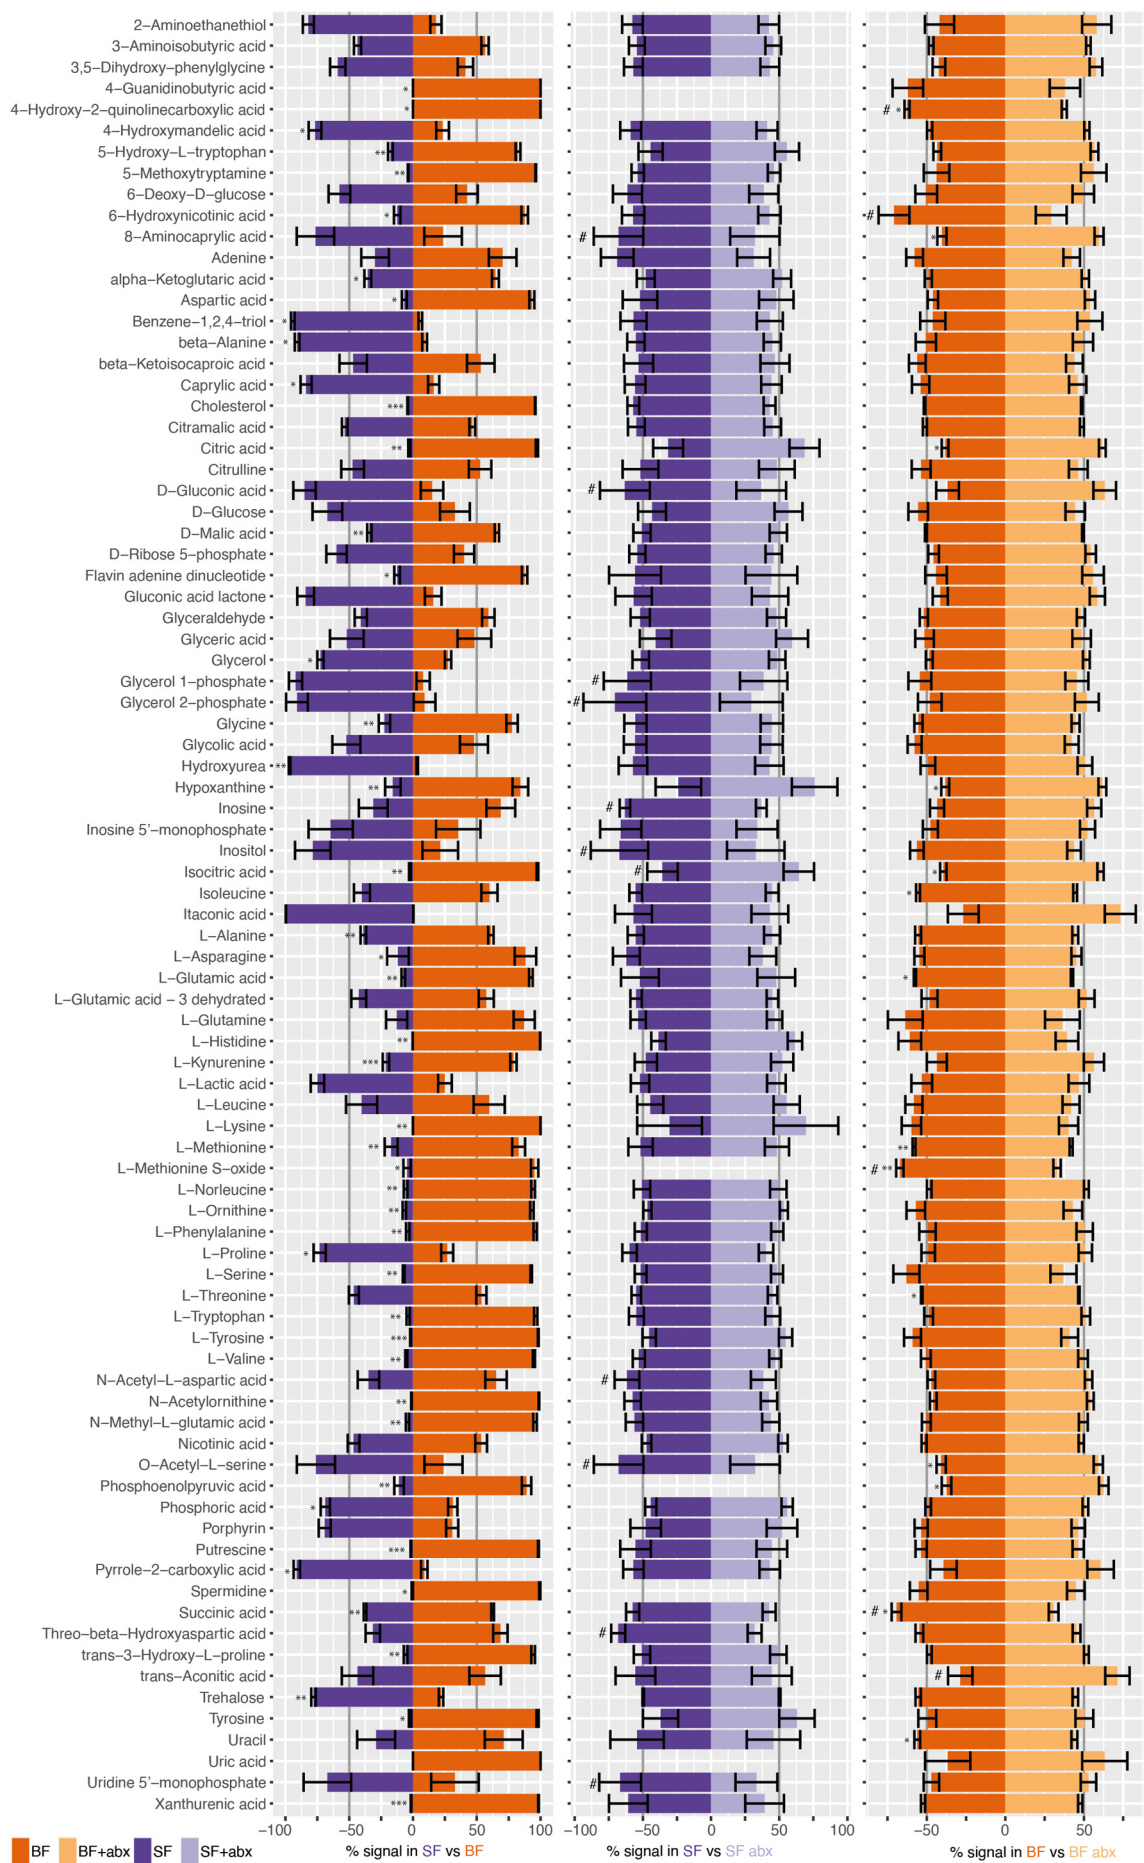

**Figure S3.** Bar charts representing the comparative percentage of signal from different conditions. Data represent the average percentage from 4 independent replicates and error bars show the standard error. t-test were used to determine statistical significance, \*  $-p < 0.05$ , \*\*  $-p < 0.01$ , \*\*\*  $-p < 0.001$ . # indicate metabolites which are consistently regulated at least 1.7-fold (ratio  $>1.7$  or  $<0.588$ ) in at least 3 of the 4 replicates by the antibiotic treatment.

**Table S1.** Primers sequences for qPCR.

| Primer name   | Forward/<br>Reverse | Gene Name                | ACOM # | Sequence                   |
|---------------|---------------------|--------------------------|--------|----------------------------|
| Cec1 F qPCR   | F                   | <i>Cecropin1</i>         | 042420 | TCATCTTTGTCGTGCTGGCA       |
| CEC1 R qPCR   | R                   | <i>Cecropin1</i>         | 042420 | TCTTCAGCCGTCCCGCT          |
| Gam1_F        | F                   | <i>Gambicin 1</i>        | 024216 | CTATCTCAACCGGAAGGGCG       |
| Gam1_R        | R                   | <i>Gambicin 1</i>        | 024216 | GCCAAACTTTCGCTTGCAGT       |
| PGRPLB_qPCR F | F                   | <i>PGRPLB</i>            | 033796 | GAGTATGGTGTCCGGAATGG       |
| PGRPLB_qPCR R | R                   | <i>PGRPLB</i>            | 033796 | GGCCAGGTTTGTATCTCCTC       |
| S7-F          | F                   | <i>S7</i>                | 041783 | GTGCGCGAGTTGGAGAAGA        |
| S7-R          | R                   | <i>S7</i>                | 041783 | ATCGGTTTGGGCAGAA TGC       |
| 16s F qPCR    | F                   | Generic bacterial<br>16S | N/A    | TCCTACGGGAGGCAGCAGT        |
| 16s R qPCR    | R                   | Generic bacterial<br>16S | N/A    | GGACTACCAGGGTATCTAATCCTGTT |
